# Supplementary material
Source: MDPI journal article supplement (https://www.mdpi.com/2071-1050/13/3/1297)
Supplement: s1 [file s1]

# Supplementary Materials

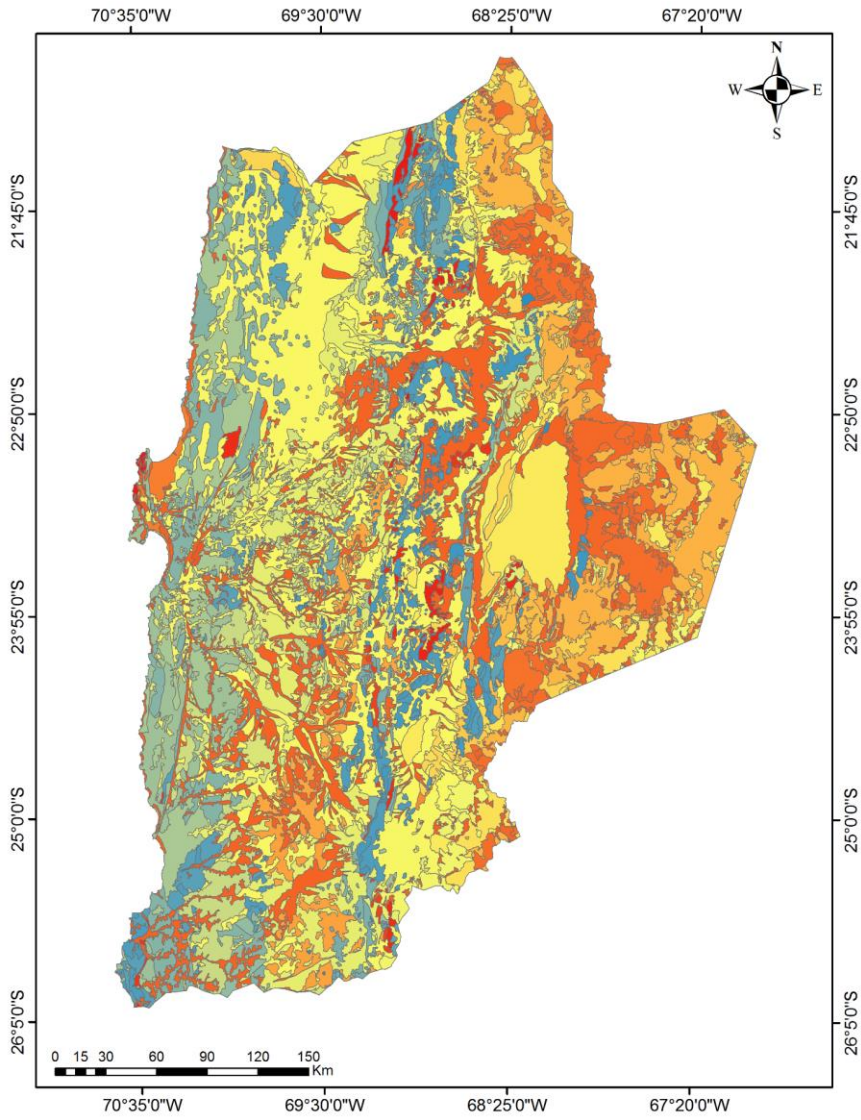

## Geology

- |                                                                                                     |                                                                                                  |                                                                                             |
|-----------------------------------------------------------------------------------------------------|--------------------------------------------------------------------------------------------------|---------------------------------------------------------------------------------------------|
| PEg-Pyroxene and biotite monzodiorites, hornblende granodiorites and monzogranites and biotites etc | Ki1m-Coastal marine sedimentary sequences                                                        | P3i-Ignimbrites                                                                             |
| CP1-Inland and marine sedimentary streams                                                           | Kia3-Continental volcanic complexes and sequences                                                | PE1c-Alluvial, river or lake sedimentary sequences                                          |
| CP2-Marine and continental volcanic sequences                                                       | KIag-Diorites and monzodiorites of pyroxene and hornblende etc.                                  | PE3a-Acid continental volcanic complexes and sequences                                      |
| CP3-Continental volcanic sequences                                                                  | KIbg-Monzodiorites and diorites of pyroxene, hornblende and biotite, granodiorites and tonalites | PE3i-Continental volcanic complexes and sequences                                           |
| CPg-Granites, granodiorites, tonalites and diorites, hornblende and biotite, locally muscovite      | Ks1c-Alluvial and lacustrine continental sedimentary sequences                                   | PI3i-Pyroclastic deposits                                                                   |
| DC1-Marine sedimentary sequences, partly transitional                                               | Ks2c-Continental volcanic sedimentary sequences                                                  | PP1c-Conglomerates, sandstones, siltstones and clays, generally consolidated etc.           |
| DC4-Meta sandstones, phyllites and, to a lesser extent, marbles, cherts etc.                        | Ks3a-Acid volcanic complexes and sequences                                                       | PP1i-Lake sedimentary sequences                                                             |
| E2c-Volcano-sedimentary sequences                                                                   | Ks3i-Continental volcanic sequences                                                              | PP1r-Mass removal tanks                                                                     |
| E3-Sequences and continental volcanic centers                                                       | Ksg-Monzodiorites, granodiorites, gabros and diorites of pyroxene, biotite and hornblende        | PTrg-Granites, hololeucocraticos, granitic porphids and biotite granodiorites               |
| EO1c-Alluvial and fluvial continental sedimentary sequences                                         | M1c-Sedimentary sequences of alluvial, pediment or fluvial fans                                  | Pag-Pyroxene and biotite monzodiorites, granodiorites and hornblende and biotite granites   |
| EOp-Granodioritic, monzonitic, dactylic and rhyolitic porphyry of biotite and hornblende etc.       | M3av-Volcanic avalanche deposits                                                                 | PI1m-Marine coastal or estuarine river sequences                                            |
| Eg-Granodiorites, shades and quartz diorites of hornblende and biotite etc.                         | M3i-Partially eroded volcanic complexes and volcanic sequences                                   | Q1g-Morrenicos, fluvio-glaciales and glaciofluviales deposits                               |
| J1m-Carbonated and clastic marine sedimentary sequences                                             | M3i-Ignimbrites Huasco, Maricunga and Vega Helada                                                | Q3av-Volcanic avalanche deposits                                                            |
| J2m-Volcanic and marine sedimentary sequences                                                       | MP1i-EI Loa, Vilama and Quillagua Formations                                                     | Q3i-Stratovolcanoes and volcanic complexes                                                  |
| J3i-Continental and marine volcanic sequences                                                       | MP1c-Clastic sedimentary sequences of piedmont, alluvial, colluvial or fluvial                   | Q3t-Pyroclastic flow tanks                                                                  |
| JK1-Transitional sedimentary sequences                                                              | MP1m-Transgressive marine sedimentary sequences                                                  | Qa-Alluvial deposits, subordinately colluvial or lacustrine                                 |
| JK1c-Alluvial, river and wind sedimentary sequences, partly transitional                            | MQs-Evaporitic deposits                                                                          | Qan-Deposits of anthropic origin                                                            |
| JK3-Volcanic sequences                                                                              | Mh-Dacitic, andesitic, monzodiorite, and hornblende, pyroxene, and biotite porphyry              | Qe-Wind deposits                                                                            |
| JKg-Punta Negra and Huará-Pozo Almonte batholiths                                                   | Ms3i-Volcanic centers and sequences                                                              | Qt-Fluvial deposits                                                                         |
| J1m-Coastal or shelf marine sedimentary sequences                                                   | Ms3i-Ignimbrites                                                                                 | Qm-Coastal Deposits                                                                         |
| JiP-Pluto Flamenco and Caldera-Pajonales                                                            | OM1c-Paralytic or alluvial continental sedimentary sequences                                     | Tr10-Alluvial, fluvial and lacustrine continental sedimentary sequences, in part transition |
| Js1m-Coastal marine sedimentary sequences                                                           | OM2c-Volcano-sedimentary sequences                                                               | Tr1m-Coastal and transitional marine sedimentary sequences                                  |
| Jsg-Quartz monzodiorites, diorites and granodiorites of biotite, pyroxene and hornblende            | OM3i-Pyroclastic sequences                                                                       | Tr1m-Marine and transitional sedimentary sequences                                          |
| KS1m-Platform, littoral or transitional marine sedimentary sequences                                | OS1m-Marine sedimentary streams                                                                  | Tr2c-Continental volcanic and sedimentary sequences                                         |
| KT1c-Alluvial and fluvial continental sedimentary sequences                                         | OS3-Igneous and sedimentary complex of the Cordon de Lila                                        | TrJ3-Continental and transitional volcanic sequences                                        |
| KT2-Cerro Totola and Venado Formation Strata                                                        | OSg-Leucocratic granites and muscovite and biotite monzogranites, granodiorites etc.             | Trg-Leucocratic granules, monzo and sienogranites of biotite and muscovite etc.             |
| KTg-Granodiorites, diorites and granite porphyry                                                    | P3i-Volcanic centers                                                                             | pC04-Micaceous, neises, migmattite and, to a lesser extent, schist etc.                     |
|                                                                                                     |                                                                                                  | pCP4-Micaceous schists, metabasites, amphibolites, ortoneises etc                           |

Figure S1. Geological map of the Antofagasta region.

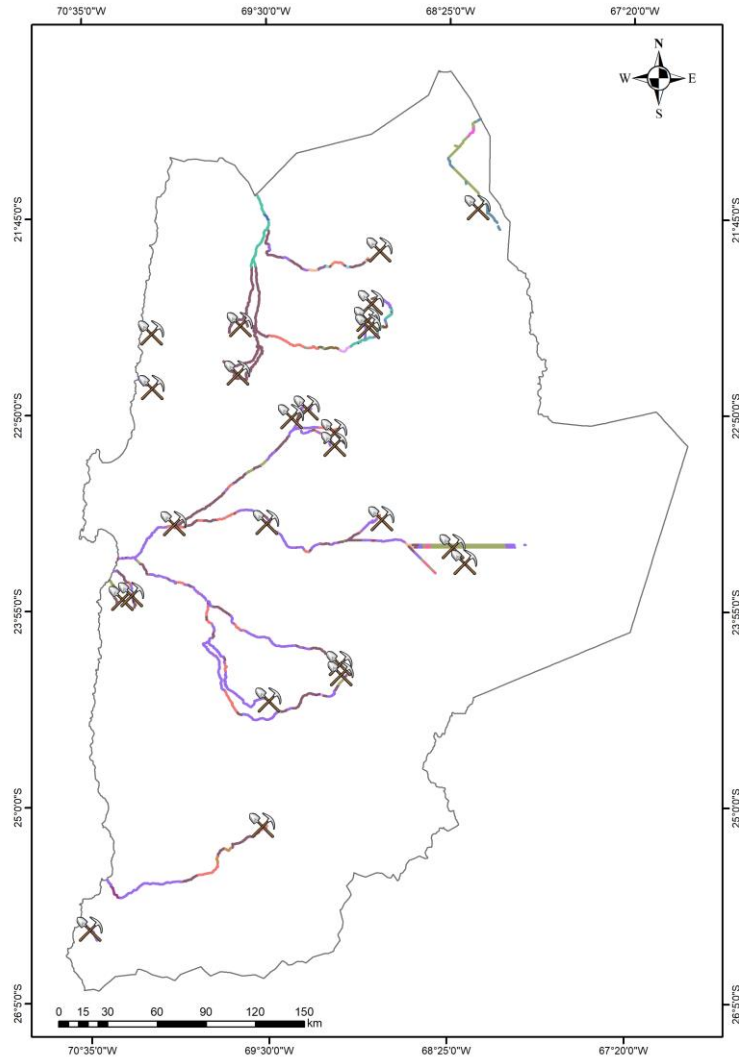

**Legend**

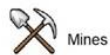

Mines

**Rivers and Lithology**

**Code and Name**

- CP3-Continental volcanic sequences
- CPg-Granites, granodiorites, tonalites and diorites, hornblende and biotite, locally muscovite
- DC4-Meta sandstones, phyllites and, to a lesser extent, marbles, cherts etc.
- E3-Sequences and continental volcanic centers
- EO1c-Alluvial and fluvial continental sedimentary sequences
- Eg-Granodiorites, shades and quartz diorites of hornblende and biotite etc.
- J1m-Carbonated and clastic marine sedimentary sequences
- J2m-Volcanic and marine sedimentary sequences
- J3i-Continental and marine volcanic sequences
- JK1c-Alluvial, river and wind sedimentary sequences, partly transitional
- Jsg-Quartz monzodiorites, diorites and granodiorites of biotite, pyroxene and hornblende
- KT1c-Alluvial and fluvial continental sedimentary sequences
- Ki1m-Coastal marine sedimentary sequences
- Kia3-Continental volcanic complexes and sequences
- Kiag-Diorites and monzodiorites of pyroxene and hornblende etc.

- Ks3a-Acid volcanic complexes and sequences
- Ks3i-Continental volcanic sequences
- Ksg-Monzodiorites, granodiorites, gabros and diorites of pyroxene, biotite and hornblende
- M1c-Sedimentary sequences of alluvial, pediment or fluvial fans
- M3i-Partially eroded volcanic complexes and volcanic sequences
- MP11-EI Loa, Vilama and Quillagua Formations
- MP1c-Clastic sedimentary sequences of piedmont, alluvial, colluvial or fluvial
- MQs-Evaporitic deposits
- OM1c-Paralytic or alluvial continental sedimentary sequences
- P3i-Volcanic centers
- PE3a-Acid continental volcanic complexes and sequences
- PE3i-Continental volcanic complexes and sequences
- PP11c-Conglomerates, sandstones, siltstones and clays, generally consolidated etc.
- Pag-Pyroxene and biotite monzodiorites, granodiorites and hornblende and biotite granites
- PI1m-Marine coastal or estuarine river sequences
- Q3av-Volcanic avalanche deposits
- Qa-Alluvial deposits, subordinately colluvial or lacustrine
- Qan-Deposits of anthropic origin
- Qm-Coastal Deposits
- Tr1m-Coastal and transitional marine sedimentary sequences
- pCO4-Micaceous, neises, migmatite and, to a lesser extent, schist etc.

**Figure S2.** Map of mines and river divided by geological unit.
